# Supplementary material for: From energy to electron transfer photocatalysis (PenT → PET): oxidative cyclobutane cleavage alters the product composition
Source: Royal Society of Chemistry journal article supplement (doi:10.1039/d2cc04693h), 2022-01-01
Supplement: d2cc04693h1.pdf [file d2cc04693h1.pdf]

## Electronic Supporting Information (ESI)

for

### From energy to electron transfer photocatalysis (*PenT*→*PET*): oxidative cyclobutane cleavage alters the product composition

J. Lefarth,<sup>a</sup> A. Haseloer,<sup>b</sup> L. Kletsch,<sup>b</sup> A. Klein,<sup>b</sup> J. Neudörfl,<sup>a</sup> A. G. Griesbeck<sup>a\*</sup>

University of Cologne, Faculty of Mathematics and Natural Sciences, Department of Chemistry, Greinstr. 4-6, D-50939 Köln, Germany

\*E-Mail: griesbeck@uni-koeln.de; <sup>a</sup> Organic Chemistry; <sup>b</sup> Inorganic Chemistry.

#### Contents

|                                           |     |
|-------------------------------------------|-----|
| 1. Catalytic screening experiments        | S1  |
| 2. Cyclic voltammetry                     | S3  |
| 3. Spectroelectrochemistry                | S6  |
| 4. Crystal structure analysis             | S7  |
| 5. <sup>13</sup> C-NMR structure analysis | S9  |
| 5. References                             | S10 |

#### 1. Catalytic screening experiments

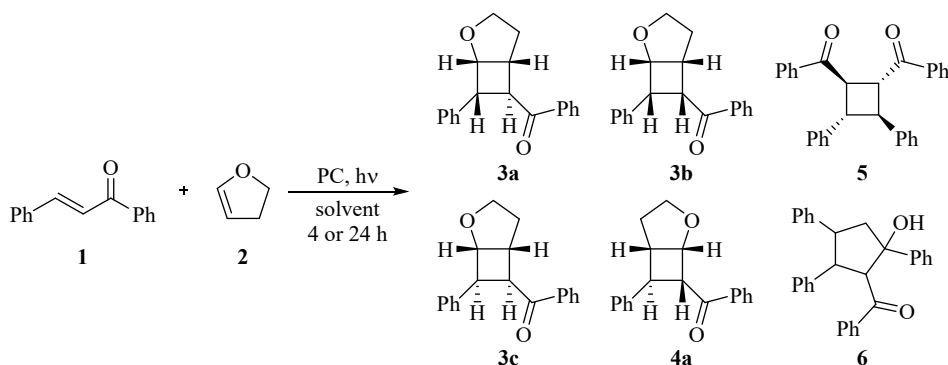

A 10 mL Pyrex tube with a small stirring bar was charged with the solvent (5.0 mL) and 26 eq. 2,3-dihydrofuran (2, 1.0 mL) for an enone concentration of  $c = 83.3$  mM. The reaction mixture was degassed with argon for 15-30 min after which chalcone (1, 0.5 mmol) and, if used, either 5.6 mg (1 mol%) [Ir-F] or 54 mg (40 mol%) MK was added. The reaction mixture was irradiated for 4 or 24 h with blue LEDs (LED PowerBar V2, Lumitronix,  $P_{\text{total}} = 11$  W,  $\lambda_{\text{max}} = 455$  nm) or a photoreactor from Rayonet (16 UV-A lamps,  $P_{\text{total}} = 128$  W (8 W per lamp),  $\lambda_{\text{max}} = 350$  nm). Afterwards, the crude reaction mixture was filtered ( $\text{SiO}_2$ , EtOAc) and analysed by GC-MS. The data is summarised in Tables S1-S3.<sup>1</sup>

**Table S1** Solvent screening using MK <sup>a</sup>

| entry          | solvent                 | yield [%] <sup>b</sup> |    |    |    |    |
|----------------|-------------------------|------------------------|----|----|----|----|
|                |                         | total                  | 3a | 3b | 5  | 6  |
| 2              | MeCN                    | 97                     | 26 | 13 | <1 | 42 |
| 3 <sup>c</sup> | MeCN                    | 9                      | 3  | <1 | <1 | 3  |
| 10             | benzene                 | 96                     | 2  | 7  | 3  | 80 |
| 7              | toluene                 | 95                     | 1  | 15 | –  | 71 |
| 11             | cyclohexane             | 81                     | 9  | 6  | 42 | 19 |
| 12             | DCM                     | 98                     | 15 | 17 | –  | 58 |
| 13             | 1,4-dioxane             | 98                     | <1 | 5  | –  | 88 |
| 14             | Et <sub>2</sub> O       | 62                     | 5  | 2  | 18 | 35 |
| 15             | acetone                 | 99                     | 7  | 14 | –  | 73 |
| 16             | EtOAc                   | 97                     | 7  | 9  | –  | 75 |
| 17             | <i>i</i> -PrOH          | 80                     | 29 | 8  | 12 | 21 |
| 18             | EtOH                    | 13                     | 9  | <1 | 1  | 2  |
| 19             | MeOH                    | 14                     | 10 | <1 | <1 | 2  |
| 20             | MeNO <sub>2</sub>       | 6                      | 3  | <1 | –  | –  |
| 21             | water                   | 7                      | 1  | <1 | 3  | 3  |
| 22             | MeCN:water <sup>d</sup> | 21                     | 5  | 1  | 1  | 13 |

<sup>a</sup> With chalcone (**1**, 83 mM, 0.5 mmol), 2,3-DHF (**2**, 26 eq.), 40 mol% MK, irradiation at  $\lambda = 350$  nm for 24 h under argon atmosphere. <sup>b</sup> Determined by GC-MS analysis. <sup>c</sup> Irradiated for 4 h. <sup>d</sup> MeCN:water mixture of 9:1.

**Table S2** Solvent screening by direct excitation of chalcone **1** <sup>a</sup>

| entry          | solvent     | yield [%] <sup>b</sup> |    |    |    |   |
|----------------|-------------|------------------------|----|----|----|---|
|                |             | total                  | 3a | 3b | 5  | 6 |
| 1 <sup>c</sup> | MeCN        | 51                     | 23 | 8  | 3  | - |
| 6              | toluene     | 83                     | 16 | 14 | 26 | - |
| 23             | 1,4-dioxane | 26                     | 10 | 3  | 4  | - |
| 24             | acetone     | 17                     | 11 | 2  | 1  | - |

<sup>a</sup> Using **1**, (83 mM) and 2,3-DHF (**2**, 26 eq.) in 5 mL MeCN at  $\lambda = 350$  nm for 24 h under argon atmosphere. <sup>b</sup> Determined by GC-MS analysis. <sup>c</sup> Mean value of four experiments.

**Table S3** Solvent screening using [Ir-F] <sup>a</sup>

| entry          | solvent           | t [h] | yield [%] <sup>b</sup> |    |    |    |    |
|----------------|-------------------|-------|------------------------|----|----|----|----|
|                |                   |       | total                  | 3a | 3b | 5  | 6  |
| 4              | MeCN              | 24    | >99                    | 33 | 44 | <1 | 1  |
| 5 <sup>c</sup> | MeCN              | 4     | 98                     | 50 | 14 | 10 | 4  |
| 8              | toluene           | 24    | 99                     | 23 | 37 | 13 | 13 |
| 9              | toluene           | 4     | 73                     | 18 | 5  | 32 | 5  |
| 25             | cyclohexane       | 4     | 61                     | 9  | 3  | 4  | -  |
| 26             | DCM               | 4     | 76                     | 30 | 8  | 20 | 2  |
| 27             | 1,4-dioxane       | 24    | 98                     | 4  | 34 | -  | 55 |
| 28             | 1,4-dioxane       | 4     | 94                     | 31 | 9  | 23 | 11 |
| 29             | acetone           | 24    | 99                     | 32 | 48 | <1 | 6  |
| 30             | EtOAc             | 24    | 99                     | 5  | 21 | -  | 68 |
| 31             | EtOAc             | 4     | 94                     | 31 | 9  | 17 | 19 |
| 32             | EtOH              | 4     | 97                     | 47 | 13 | 7  | 9  |
| 33             | HFIP <sup>d</sup> | 4     | 61                     | 3  | <1 | 56 | 2  |

<sup>a</sup> Chalcone (**1**, 83 mM), 2,3-DHF (**2**, 26 eq.), 1 mol% [Ir-F], irradiation with blue LEDs under argon atmosphere. <sup>b</sup> Determined by GC-MS analysis. <sup>c</sup> Mean value of four experiments. <sup>d</sup> HFIP = hexafluoroisopropanol.

## 2. Cyclic voltammetry

Cyclic voltammograms (CV) were measured under an argon atmosphere in extra dry MeCN with 0.1 M  $n\text{Bu}_4\text{NPF}_6$  as electrolyte and referenced to the ferrocene/ferrocenium couple as an internal standard ( $\text{Fc}/\text{Fc}^+$ ). The three electrodes consisted of a glassy carbon working electrode, a platinum counter electrode and an  $\text{Ag}/\text{AgCl}$  pseudo reference electrode. The scan rate was 100 mV/s if not stated otherwise. The recording was performed with a Metrohm *Autolab PG STAT* potentiostat.

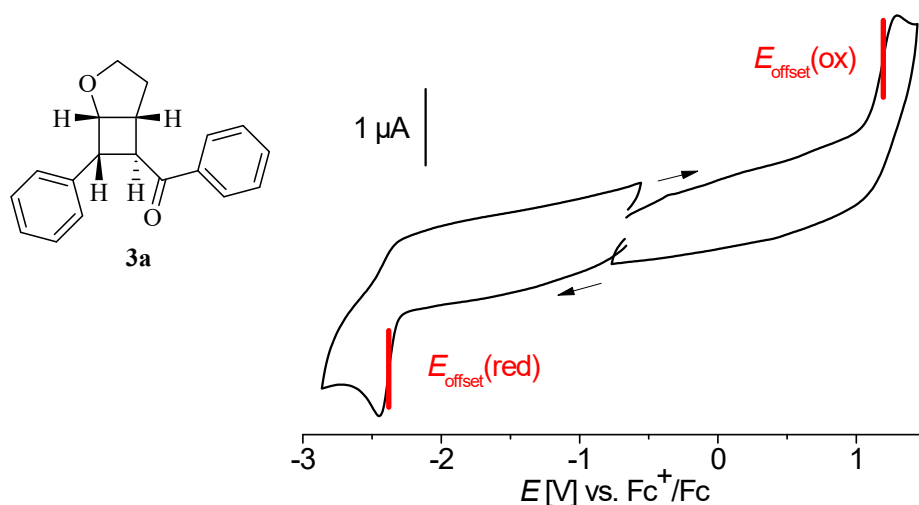

**Fig. S1** Cyclic voltammograms of cyclobutane **3a** in 0.1 M  $n\text{Bu}_4\text{NPF}_6/\text{MeCN}$ . Offset potentials ( $E_{\text{offset}}$ ) marked in red represent the approximated half-wave potentials.

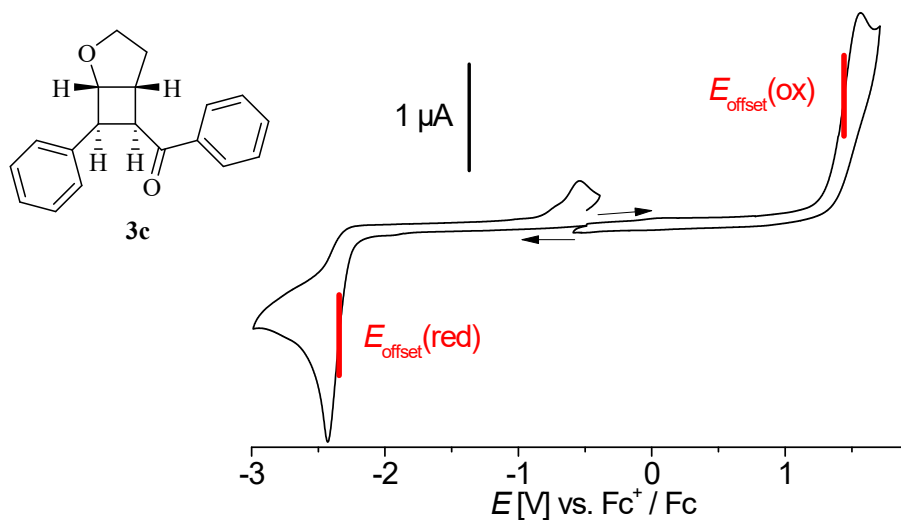

**Fig. S2** Cyclic voltammograms of cyclobutane **3c** in 0.1 M  $n\text{Bu}_4\text{NPF}_6/\text{MeCN}$ . Offset potentials ( $E_{\text{offset}}$ ) marked in red represent the approximated half-wave potentials.

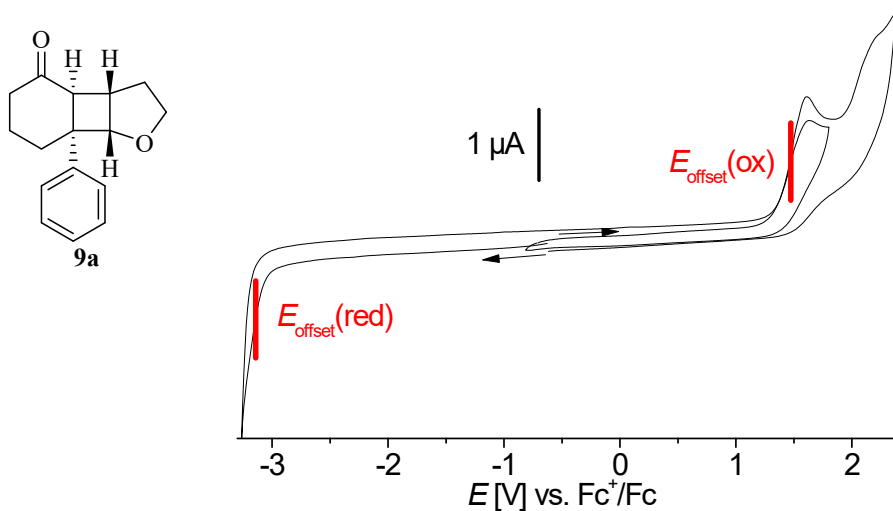

**Fig. S3** Cyclic voltammograms of cyclobutane **9a** in 0.1 M  $n\text{Bu}_4\text{NPF}_6/\text{MeCN}$ . Offset potentials ( $E_{\text{offset}}$ ) marked in red represent the approximated half-wave potentials.

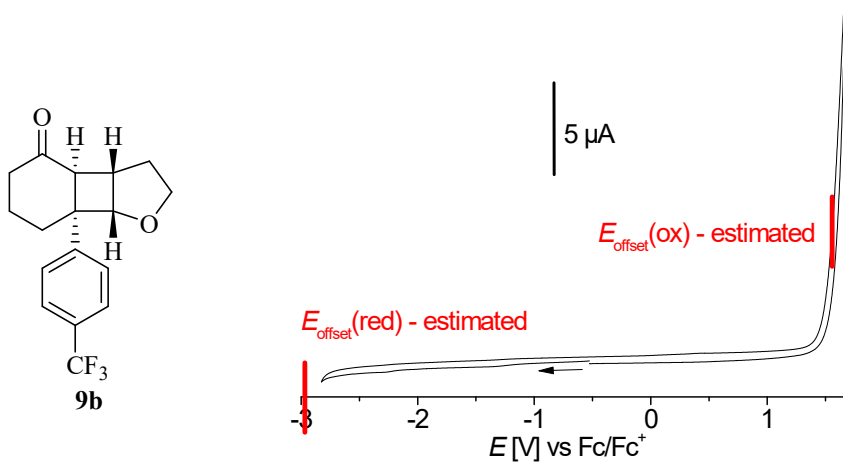

**Fig. S4** Cyclic voltammograms of cyclobutane **9b** in 0.1 M  $n\text{Bu}_4\text{NPF}_6/\text{MeCN}$ . Estimated offset potentials ( $E_{\text{offset}}$  - estimated) marked in red represent the maximum half-wave potentials.

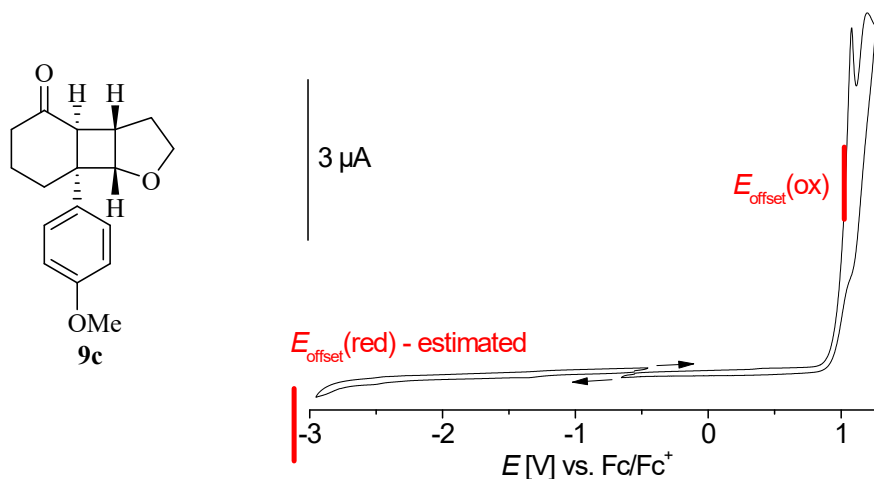

**Fig. S5** Cyclic voltammograms of cyclobutane **9c** in 0.1 M  $n\text{Bu}_4\text{NPF}_6/\text{MeCN}$ . Offset potentials ( $E_{\text{offset}}$ ) marked in red represent the approximated half-wave potentials. Estimated offset potentials ( $E_{\text{offset}} - \text{estimated}$ ) marked in red represent the maximum half-wave potentials.

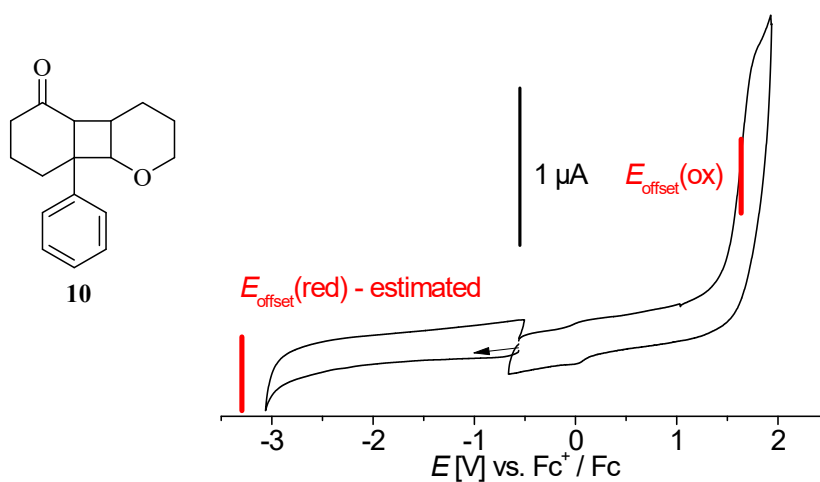

**Fig. S6** Cyclic voltammogram of cyclobutane **10** in 0.1 M  $n\text{Bu}_4\text{NPF}_6/\text{MeCN}$ . Offset potentials ( $E_{\text{offset}}$ ) marked in red represent the approximated half-wave potentials. Estimated offset potentials ( $E_{\text{offset}} - \text{estimated}$ ) marked in red represent the maximum half-wave potentials.

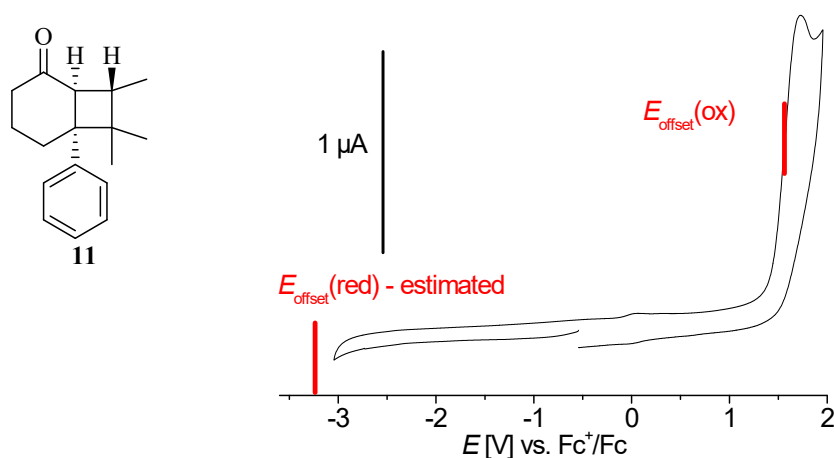

**Fig. S7** Cyclic voltammogram of cyclobutane **11** in 0.1 M  $n\text{Bu}_4\text{NPF}_6/\text{MeCN}$ . Offset potentials ( $E_{\text{offset}}$ ) marked in red represent the approximated half-wave potentials. Estimated offset potentials ( $E_{\text{offset}} - \text{estimated}$ ) marked in red represent the maximum half-wave potentials.

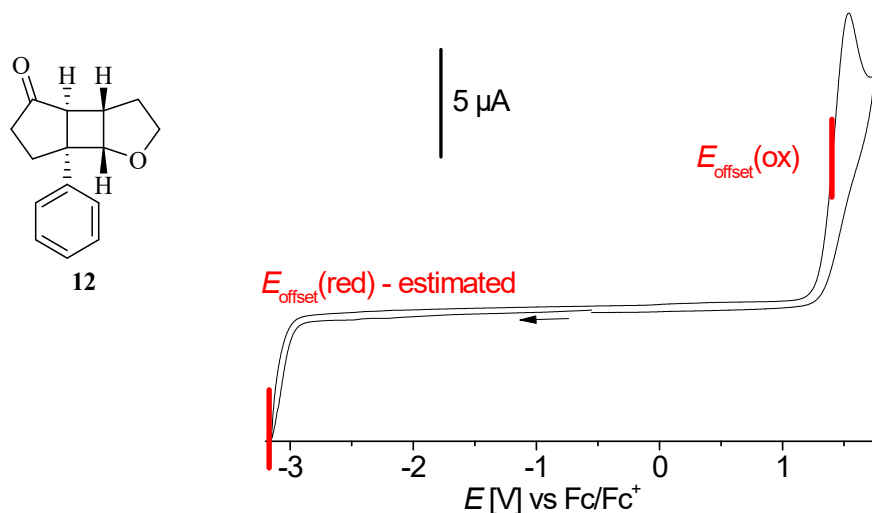

**Fig. S8** Cyclic voltammogram of cyclobutane **12** in 0.1 M  $n\text{Bu}_4\text{NPF}_6/\text{MeCN}$ . Offset potentials ( $E_{\text{offset}}$ ) marked in red represent the approximated half-wave potentials. Estimated offset potentials ( $E_{\text{offset}} - \text{estimated}$ ) marked in red represent the maximum half-wave potentials.

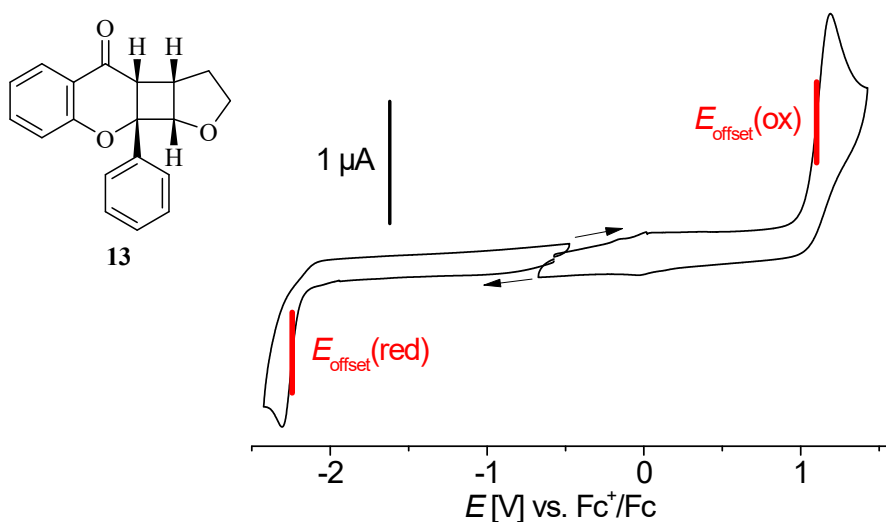

**Fig. S9** Cyclic voltammograms of cyclobutane **13** in 0.1 M  $n\text{Bu}_4\text{NPF}_6/\text{MeCN}$ . Offset potentials ( $E_{\text{offset}}$ ) marked in red represent the approximated half-wave potentials.

### 3. Spectroelectrochemistry

The spectra were recorded under an argon atmosphere in extra dry MeCN with 0.1 M  $(n\text{Bu}_4\text{N})(\text{PF}_6)$  as electrolyte in an *OTTLE*-cell (optical thin layer electrochemical cell)<sup>2</sup> using *Varian 50 Scan UV-visible* spectrophotometer. Typically, the voltage was increased in 100 mV steps over a broad range of potentials and in 10 mV steps close to the potentials of the redox events (from CV). UV-vis absorption spectra measured after 1 min at each potential.<sup>3, 4</sup>

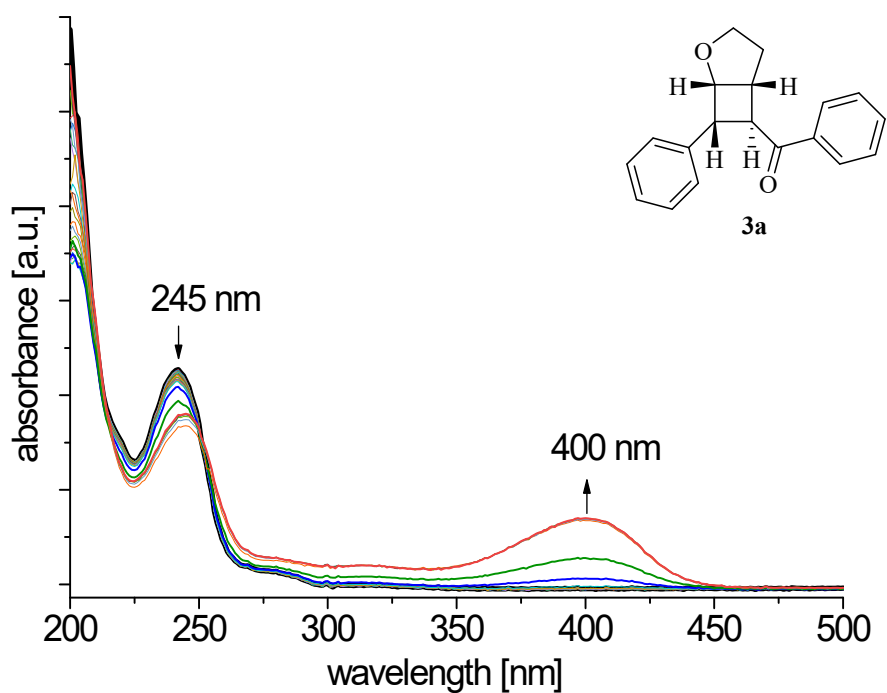

**Fig. S10** Spectroelectrochemistry of cyclobutane **3a** in 0.1 M  $n\text{Bu}_4\text{NPF}_6/\text{MeCN}$  upon anodic oxidation in the range 0 to 1.3 V vs. ferrocene/ferrocenium.

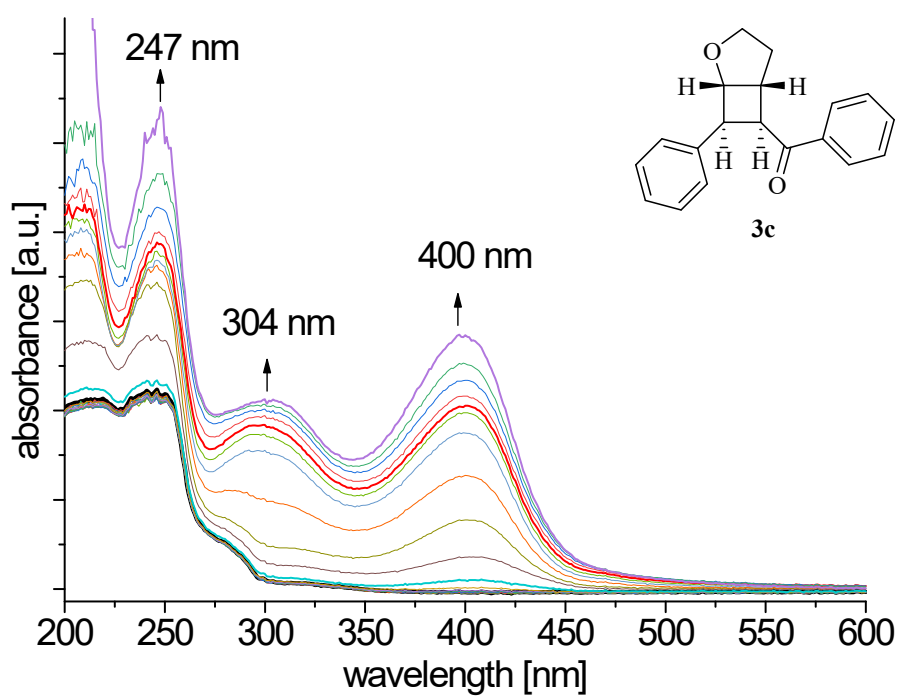

**Fig. S11** Spectroelectrochemistry of cyclobutane **3c** 0.1 M  $n\text{Bu}_4\text{NPF}_6/\text{MeCN}$  upon anodic oxidation in the range 0 to 1.5 V.

#### 4. Crystal structure analysis

Single crystal X-ray structure data was determined at 100 K on a Nonius Kappa CCD four-circle diffractometer from *Bruker* with molybdenum source or a D8 Venture with copper microfocus source. The structures were refined using SHELXT and SHELXL.<sup>5</sup> Selected metrics of the cyclobutane

structures (Fig. S10) are listed in Tables S4 and S5, full structural data and results of the structure solution and refinement can be obtained from the CCSD data base (for entry numbers, see Tables S4-S6).

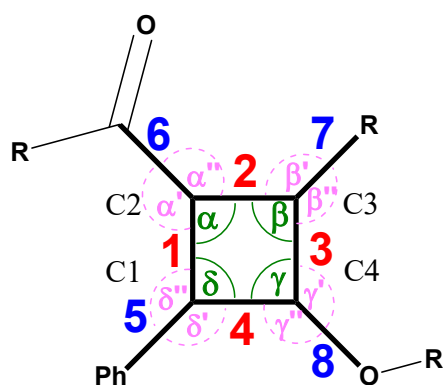

**Fig. S10** Nomenclature for the crystal structure analysis summarised in Table S4-S6.

**Table S4** Selected bond angles for cyclobutanes from crystal structure analysis.

| angles<br>(°)  | 3c         | 9a        | 9b         | 9c_1     | 9c_2     | 9c_3     | 9c_4     | 11        | 13                   |
|----------------|------------|-----------|------------|----------|----------|----------|----------|-----------|----------------------|
| $\alpha$       | 90.60(9)   | 89.44(1)  | 88.92(11)  | 89.4(2)  | 89.9(2)  | 90.0(2)  | 89.7(2)  | 88.00(7)  | 91.10(8)             |
| $\beta$        | 89.54(9)   | 90.14(1)  | 89.44(12)  | 90.5(2)  | 90.2(2)  | 90.3(2)  | 90.5(2)  | 88.22(7)  | 89.28(8)             |
| $\gamma$       | 91.26(9)   | 90.19(1)  | 89.25(11)  | 90.3(2)  | 90.2(2)  | 90.2(2)  | 90.2(2)  | 87.11(7)  | 90.67(8)             |
| $\delta$       | 88.08(8)   | 89.65(1)  | 89.52(11)  | 89.3(2)  | 89.2(2)  | 89.2(2)  | 89.1(2)  | 87.82(7)  | 88.54(8)             |
| $\alpha'$      | 117.01(10) | 119.46(1) | 120.65(12) | 120.3(2) | 119.5(3) | 119.4(2) | 120.0(3) | 120.23(8) | 116.86(9)            |
| $\alpha''$     | 117.62(10) | 114.43(1) | 116.30(13) | 112.7(2) | 113.9(2) | 113.0(2) | 112.6(2) | 118.01(9) | 119.94(9)            |
| $\beta'$       | 115.73(10) | 114.76(1) | 115.16(13) | 113.9(2) | 114.3(3) | 114.6(2) | 114.4(2) | 118.54(8) | 119.14(9)            |
| $\beta''$      | 103.68(9)  | 104.15(1) | 104.34(13) | 104.6(2) | 104.1(2) | 104.2(2) | 104.3(2) | 120.69(9) | 103.80(9)            |
| $\gamma'$      | 107.55(9)  | 107.23(1) | 107.01(12) | 107.0(2) | 107.3(2) | 107.3(2) | 107.3(2) | 116.32(9) | 108.81(8)            |
| $\gamma''$     | 114.97(9)  | 117.45(1) | 117.20(13) | 118.2(2) | 118.1(2) | 118.2(2) | 118.4(2) | 118.62(8) | 116.32(9)            |
| $\delta'$      | 116.12(10) | 118.54(1) | 117.90(12) | 114.0(2) | 115.4(2) | 116.0(2) | 115.0(2) | 117.42(8) | 116.01(8)            |
| $\delta''$     | 116.84(10) | 116.01(1) | 116.82(12) | 118.4(2) | 118.5(2) | 117.5(2) | 117.4(2) | 117.94(8) | 118.44(9)            |
| $\delta'''$    |            | 109.73(1) | 111.38(12) | 110.9(2) | 110.5(2) | 110.1(2) | 110.5(2) | 112.84(8) | 109.51(8)            |
| $\delta''''$   |            | 110.66(1) | 108.33(12) | 111.7(2) | 111.7(2) | 111.6(2) | 111.8(2) | 109.60(8) | 108.92(8)            |
| $\delta'''''$  |            | 110.89(1) | 111.01(12) | 111.0(2) | 110.0(2) | 111.1(2) | 111.7(2) | 109.70(8) | 113.85(8)            |
| $\gamma'''$    |            |           |            |          |          |          |          | 112.19(8) | 116.51(8)            |
| $\gamma''''$   |            |           |            |          |          |          |          | 112.02(8) | 108.37(8)            |
| CCDC<br>number | 2192929    | 2192930   | 2192931    | 2192933  | 2192933  | 2192933  | 2192933  | 2192932   | 2089434 <sup>6</sup> |



**Table S5** Selected bond length for cyclobutanes from crystal structure analysis.

| bond length (Å) | 3c         | 9a        | 9b       | 9c_1     | 9c_2     | 9c_3     | 9c_4     | 11         | 13                   |
|-----------------|------------|-----------|----------|----------|----------|----------|----------|------------|----------------------|
| 1               | 1.5844(17) | 1.5663(1) | 1.558(2) | 1.574(4) | 1.568(4) | 1.571(4) | 1.574(4) | 1.5553(14) | 1.5550(14)           |
| 2               | 1.5467(16) | 1.5666(1) | 1.569(2) | 1.566(4) | 1.567(4) | 1.564(4) | 1.564(4) | 1.5666(14) | 1.5628(15)           |
| 3               | 1.5553(17) | 1.5494(1) | 1.554(2) | 1.547(4) | 1.551(4) | 1.551(4) | 1.549(4) | 1.5622(15) | 1.5506(15)           |
| 4               | 1.5584(16) | 1.5630(1) | 1.564(2) | 1.571(4) | 1.577(4) | 1.577(4) | 1.575(4) | 1.5849(14) | 1.5787(15)           |
| 5               | 1.5035(17) | 1.5140(1) | 1.508(2) | 1.514(4) | 1.509(4) | 1.504(4) | 1.513(4) | 1.5155(14) | 1.5147(14)           |
| 6               | 1.5038(16) | 1.4991(1) | 1.510(2) | 1.491(4) | 1.493(4) | 1.499(4) | 1.497(4) | 1.5056(14) | 1.5070(15)           |
| 7               | 1.5248(17) | 1.5217(1) | 1.521(2) | 1.522(4) | 1.517(4) | 1.523(4) | 1.516(4) | 1.5173(14) | 1.5310(15)           |
| 8               | 1.4239(15) | 1.4207(1) | 1.417(2) | 1.418(4) | 1.417(4) | 1.421(4) | 1.417(4) | 1.5283(15) | 1.4077(13)           |
| 5'              |            | 1.5483(1) | 1.546(2) | 1.539(4) | 1.549(4) | 1.538(4) | 1.537(4) | 1.5405(14) | 1.4372(13)           |
| 8'              |            |           |          |          |          |          |          | 1.5247(15) |                      |
| CCDC number     | 2192929    | 2192930   | 2192931  | 2192933  | 2192933  | 2192933  | 2192933  | 2192932    | 2089434 <sup>6</sup> |

**Table S6** Selected dihedral angles for cyclobutanes from crystal structure analysis.

| dihedral angle (°) | 3c       | 9a      | 9b         | 9c_1    | 9c_2    | 9c_3    | 9c_4    | 11        | 13                   |
|--------------------|----------|---------|------------|---------|---------|---------|---------|-----------|----------------------|
| C2-C3-C4-C1        | 5.51(9)  | -5.79   | 12.77(11)  | -5.7(2) | 5.3(2)  | 4.5(2)  | -5.3(2) | 22.06(7)  | -4.83(8)             |
| C3-C2-C1-C4        | 5.41(9)  | -5.73   | 12.74(11)  | -5.6(2) | 5.3(2)  | 4.4(2)  | -5.2(2) | 22.15(7)  | -4.82(8)             |
| C2-C1-C4-C3        | -5.38(9) | 5.79    | -12.86(11) | 5.7(2)  | -5.3(2) | -4.4(2) | 5.3(2)  | -22.23(7) | 4.86(8)              |
| C4-C3-C2-C1        | -5.42(9) | 5.78    | -12.82(11) | 5.7(2)  | -5.3(2) | -4.5(2) | 5.3(2)  | -22.49(7) | 4.91(8)              |
| CCDC number        | 2192929  | 2192930 | 2192931    | 2192933 | 2192933 | 2192933 | 2192933 | 2192932   | 2089434 <sup>6</sup> |

## 5. <sup>13</sup>C-NMR structure analysis

We tried to correlate the redox process to the <sup>13</sup>C NMR shifts of the respective cyclobutane nuclei (Table S7). The reason behind this was that a small oxidation potential could correlate to an increased electron density at certain carbon nuclei, which would in return correlate to a high-field shift in the <sup>13</sup>C NMR spectra. Although there is some evidence for this hypothesis from comparison of cyclobutane **3a** and **3c** (C1 and C4), cyclobutanes **9a-c** show almost no deviation of the <sup>13</sup>C NMR shifts. Hence, <sup>13</sup>C NMR analysis does not appear to be a suitable tool to describe the observations properly.

**Table S7** <sup>13</sup>C NMR data of the cyclobutanes <sup>a</sup>

| compound  | C1   | C2   | C3   | C4   |
|-----------|------|------|------|------|
| <b>3a</b> | 44.1 | 49.4 | 41.8 | 78.9 |
| <b>3c</b> | 50.8 | 48.3 | 37.6 | 87.0 |
| <b>9a</b> | 51.4 | 52.3 | 40.6 | 84.3 |
| <b>9b</b> | 51.3 | 52.3 | 40.6 | 84.2 |
| <b>9c</b> | 50.8 | 52.4 | 40.5 | 84.1 |
| <b>11</b> | 52.4 | 53.1 | 41.2 | 42.3 |
| <b>13</b> | 81.8 | 48.7 | 42.6 | 87.0 |

<sup>a</sup> Chemical shifts in ppm, C atoms as depicted in Fig. 5.

## 6. References

1. J. Lefarth and A. G. Griesbeck, *J. Org. Chem.*, 2022, **87**, 8028-8033.
2. M. Krejčík, M. Daněk and F. Hartl, *J. Electroanal. Chem. Interf. Electrochem.*, 1991, **317**, 179-187.
3. W. Kaim and J. Fiedler, *Chem. Soc. Rev.*, 2009, **38**, 3373-3382.
4. W. Kaim and A. Klein, *Spectroelectrochemistry*, RSC Publishing, Cambridge, 2008.
5. G. M. Sheldrick, *Acta Crystallogr A Found Adv*, 2015, **71**, 3-8.
6. J. Lefarth, J. Neudörfl and A. G. Griesbeck, *Molbank*, 2021, **2021**, M1256. <https://doi.org/10.3390/M1256>.
